# Supplementary material for: Thrombotic Microangiopathy among Hospitalized Patients with Systemic Lupus Erythematosus in the United States
Source: PubMed Central journal article supplement (PMC7838946; doi:10.3390/diseases9010003), 2020-12-24
Supplement: diseases-09-00003-s001.pdf [file diseases-09-00003-s001.pdf]

Table S1 ICD-9 codes

|                                         |                                                                                                                                                                                                                                                                                        |
|-----------------------------------------|----------------------------------------------------------------------------------------------------------------------------------------------------------------------------------------------------------------------------------------------------------------------------------------|
| Systemic lupus erythematosus            | 710.0                                                                                                                                                                                                                                                                                  |
| Thrombotic microangiopathy              | 446.6                                                                                                                                                                                                                                                                                  |
| Hypertension                            | 401.1, 401.9, 642.00–642.24, 401.0, 402.00– 405.99, 437.2, 642.10–624.24, 642.70–642.94                                                                                                                                                                                                |
| Dyslipidemia                            | 272.xx                                                                                                                                                                                                                                                                                 |
| Chronic kidney disease                  | 585.1, 585.2, 585.3, 585.3, 585.4, 585.5, 585.6, 585.9                                                                                                                                                                                                                                 |
| Cirrhosis                               | 456.xx, 567.23, 571.xx, 789.59                                                                                                                                                                                                                                                         |
| Kidney biopsy                           | 55.23, 55.24                                                                                                                                                                                                                                                                           |
| Therapeutic plasmapheresis              | 99.7, 99.71, 99.79                                                                                                                                                                                                                                                                     |
| Invasive mechanical ventilation         | 96.70-96.73                                                                                                                                                                                                                                                                            |
| Renal replacement therapy               | 39.95                                                                                                                                                                                                                                                                                  |
| Hemodialysis                            | 39.95, v45.1, v56.0, v56.1                                                                                                                                                                                                                                                             |
| Peritoneal dialysis                     | 54.98, v56.2, v56.32                                                                                                                                                                                                                                                                   |
| Kidney transplant                       | 55.6, 55.69                                                                                                                                                                                                                                                                            |
| Hemoptysis                              | 786.3x, 770.3                                                                                                                                                                                                                                                                          |
| Pleural effusion/pleuritis              | 511.xx                                                                                                                                                                                                                                                                                 |
| Pericarditis, myocarditis, endocarditis | 420.xx, 422.xx, 424.91                                                                                                                                                                                                                                                                 |
| Glomerulonephritis                      | 580.xx-586.xx, 791.0                                                                                                                                                                                                                                                                   |
| Encephalitis, myelitis, encephalopathy  | 323.xx, 348.3x                                                                                                                                                                                                                                                                         |
| Hemolytic anemia                        | 283.xx, 285.xx                                                                                                                                                                                                                                                                         |
| Thrombocytopenia                        | 287.3x, 287.4x, 287.5                                                                                                                                                                                                                                                                  |
| Pneumonia                               | 480.xx-486.xx                                                                                                                                                                                                                                                                          |
| Urinary tract infection                 | 599.0                                                                                                                                                                                                                                                                                  |
| Sepsis                                  | 038.0, 038.10, 038.11, 038.19, 038.2, 038.3, 038.4, 038.40, 038.41, 038.42, 038.43, 038.44, 038.49, 038.8, 038.9, 790.7, 117.9, 112.5, 115.04, 115.14, 115.94, 112.81, 112.83, 003.1, 003.21, 036.2, 036.3, 036.0, 036.1, 036.42, 020.2, 022.3, 098.89, 098.84, 098.82, 995.92, 785.52 |
| Ischemic stroke                         | 433.xx, 434.xx, 435.xx, 436.00, 38.12, 39.51, 39.52, 39.72, 39.79, 88.41, 99.10                                                                                                                                                                                                        |
| Seizure                                 | 345.00-345.91, 780.3-780.39, 89.14                                                                                                                                                                                                                                                     |
| Acute Kidney Injury                     | 584, 584.5, 584.6, 584.7, 584.8, 584.9 (exclude 585.5, 585.6)                                                                                                                                                                                                                          |
